# Supplementary material for: 1T/1T′-dominated WSe2 with stabilized oxygen dopants for efficient and durable hydrogen evolution
Source: Royal Society of Chemistry journal article supplement (doi:10.1039/d1ta01370j), 2021-01-01
Supplement: d1ta01370j1.pdf [file d1ta01370j1.pdf]

## Electronic Supplementary Information (ESI)

### **1T/1T'-dominated WSe<sub>2</sub> with stabilized oxygen dopants for efficient and durable hydrogen evolution**

Zhuxing Sun<sup>a†</sup>, Yiwen Wang<sup>a†</sup>, Junyu Lang<sup>a</sup>, Mengfei Yang<sup>a</sup>, Fangming Jin<sup>a\*</sup>, Yun Hang Hu<sup>b\*</sup>

<sup>a</sup> School of Environmental Science and Engineering, Shanghai Jiao Tong University, Shanghai, 200240, China

<sup>b</sup> Department of Materials Science and Engineering, Michigan Technological University, Houghton, MI 49931, United States

Corresponding author E-mails: [fmjin@sjtu.edu.cn](mailto:fmjin@sjtu.edu.cn), [yunhangh@mtu.edu](mailto:yunhangh@mtu.edu)

† Both authors contribute equally to this work.

## Experimental Details

### Material Synthesis

Hybrid-phase  $\text{WSe}_2$  (*hp*- $\text{WSe}_2$ ) was synthesized by a one-pot solvothermal strategy. Precisely 2 mmol  $\text{SeO}_2$  powder were dissolved in 30 mL DMF and continuously stirred at 50 °C to form a homogenous solution. After that, 1 mmol of  $\text{WCl}_6$  was added to the mixture. After that, a graphite rod (with a diameter of 3 mm and a length of 50 mm) was soaked in the as-prepared precursor mixture for 12 h. Then, the graphite rod and the mixture were transferred into a 50 mL autoclave and heated at 200 °C for 12 h. The autoclave was cooled down to the room temperature naturally. Thus, a graphite rod grown with *hp*- $\text{WSe}_2$  catalysts was obtained. The sample was then rinsed several times by deionized water and ethanol to remove the residuals and kept in deionized water before tests.

$\text{Co}/hp\text{-WSe}_2$  and  $\text{Co}/\text{P}/hp\text{-WSe}_2$  were synthesized via similar solvothermal processes, except that  $\text{Co}(\text{NO}_3)_2$  and  $\text{KH}_2\text{PO}_4$  were additionally introduced to the precursor solution. Respectively, 0.1 mmol of  $\text{Co}(\text{NO}_3)_2$  and 0.9 mmol  $\text{WCl}_6$  were added to the mixture of 2 mmol  $\text{SeO}_2$  and 30 mL DMF for  $\text{Co}/hp\text{-WSe}_2$ ; for  $\text{Co}/\text{P}/hp\text{-WSe}_2$ , 0.1 mmol  $\text{Co}(\text{NO}_3)_2$ , 0.1 mmol  $\text{KH}_2\text{PO}_4$  and 0.9 mmol  $\text{WCl}_6$  were added to the mixture of 1.9 mmol  $\text{SeO}_2$  and 30 mL DMF.

### Characterization

The microscopic morphologies of the as-obtained materials were investigated by with field emission scanning electron microscopy (SEM, Sirion 200/IAC) and transmission electron microscopy (TEM, FEI Tecnai G2 F20). The crystal phases of the samples were collected on an X-ray diffractometer (XRD-6100, LabX, SHIMADZU Ltd. Japan) with Cu-K radiation. The chemical state of the elements in the samples were studied by X-ray photoemission spectroscopy (XPS, Thermo Fisher Scientific Escalab 250Xi) with a monochromatic Al  $\text{K}\alpha$  source. The ratios of different elements in the catalysts are measured by inductively coupled plasma-mass

spectroscopy (ICP-MS, Thermo Fisher Scientific, ICP Q). The BET surface area was acquired on a surface area and porosity analyzer (Micromeritics ASAP 2020 PLUS HD88, USA).

### **Electrochemical Measurements**

Electrochemical measurements were performed in a 3-electrode system using an electrochemical station (CHI 760E, CH instruments, Inc., USA). The electrolyte was 0.5 M H<sub>2</sub>SO<sub>4</sub>. The as-prepared 3D electrodes (3 mm in diameter) were used directly as the working electrode with an immersed length of 21 mm. An Ag/AgCl electrode and a graphite electrode were used as the reference and counter electrodes, respectively. The potential was calibrated with respect to reversible hydrogen electrode (RHE), i.e.,  $E_{\text{RHE}} = E_{\text{Ag/AgCl}} + 0.1976 \text{ V}$  in 0.5 M H<sub>2</sub>SO<sub>4</sub>. Linear sweep voltammetry (LSV) experiments were performed from 0 to -0.4 V (vs. RHE) with a sweep rate of 0.5 mV/s to obtain the polarization curves. Since the electrochemical cell contains series resistances in the wiring, solution, and substrate, all of the data were iR-corrected by subtracting the ohmic resistance loss from the overpotential.

Cyclic voltammetry (CV) tests were performed between -0.3 to 0 V at a scanning rate of 100 mV/s for 1000-3000 cycles. Electrochemical impedance spectroscopy (EIS) were recorded with a frequency range of 0.01~10<sup>4</sup> Hz and an amplitude of 5 mV at an overpotential of 0.2 V vs RHE. The onset potential was defined as the potential when the current density (j) reached 1.0 mA/cm<sup>2</sup>. The Tafel plots were recorded with the linear regions fitted into the Tafel equation  $\eta = b \log(j) + a$ , where  $\eta$ , j and b are the overpotential, current density and Tafel slope, respectively. The electrochemically active surface area (ECSA) was estimated based on the electrochemical double-layer capacitance (C<sub>dl</sub>) and mass density. The C<sub>dl</sub> of the catalytic surface was calculated based on the CV results at 0.4-0.6 V vs RHE using different scan rates (5, 10, 15, 20, 15, 30 mV/s).

### **Theoretical Calculation**

Quantum-chemical calculations were performed using Vienna ab initio simulation package (VASP). Generalized Gradient Approximation (GGA) in the Perdew-Burke-

Ernzerhof (PBE) parametrization was used for description of exchange correlation potential. The s, p electrons in selenium (Se), oxygen (O) and phosphorus (P), the 5d, 6s electrons in tungsten (W) and the 4s, 3d electrons in cobalt (Co) were treated as valence electrons, applying Projector-augmented wave (PAW) atomic potentials.<sup>1</sup> A plane-wave cutoff of 500 eV was used, and a Monkhorst-Pack 4×4×1-point grid was used to sample the Brillouin zone. The calculations were performed using atomic position relaxations, with convergence criteria corresponding to the maximum residual force component of 0.03 eV/Å. Periodic boundary conditions were used in all directions and a vacuum region of 15 Å was introduced along the out-of-plane direction to eliminate spurious interactions among periodic images of 2D structures or along all three directions for individual molecules.

4×4 supercells of 1T' WSe<sub>2</sub> and 1T' WSe<sub>2</sub>-O were employed as the main models for the studies of H adsorption. The hydrogen adsorption free energies,  $\Delta G_{H^*}$ , were determined in the same way as in previous studies.<sup>2, 3</sup> The hydrogen adsorption energy is defined as:

$$\Delta E_H = E_{WSe_2+H} - E_{WSe_2} - 1/2 E_{H_2} \quad (1)$$

where  $E_{WSe_2+H}$ ,  $E_{WSe_2}$  and  $E_{H_2}$  refer to the total energies of WSe<sub>2</sub> with adsorbed H\*, a clean WSe<sub>2</sub>, and gas phase hydrogen molecule. The hydrogen adsorption free energy was calculated at zero potential and pH= 0 as:

$$\Delta G_{H^*} = \Delta E_H + \Delta E_{ZPE} - T\Delta S \quad (2)$$

where  $\Delta E_H$  is the hydrogen adsorption energy,  $\Delta E_{ZPE}$  is the difference in zero point energy, T is the temperature (300 K) and  $\Delta S$  is the difference in entropy between H that is adsorbed and in the gas phase, at 101325 Pa. According to previous studies,  $\Delta E_{ZPE} - T\Delta S$  is approximately +0.24 eV.<sup>4</sup>

The formation energy,  $E_f$ , of the impurity O is defined as the energy needed to insert an O atom into WSe<sub>2</sub> after removing one Se atom.

$$E_f = E_{WSe_2-O} - E_{WSe_2} + \mu_{Se} - \mu_O \quad (3)$$

where  $E_{WSe_2-O}$  are the total energy of 2H or 1T' WSe<sub>2</sub> with one O impurity,  $\mu_{Se}$  is the chemical potential of Se (set equal to the energy per atom of bulk Se), and  $\mu_O$  is the chemical potential of an O atom (set equal to the energy per atom of O<sub>2</sub>). When the

influence of Co and P is considered,  $E_{\text{WSe}_2\text{-O}}$  is replaced by  $E_{\text{Co/WSe}_2\text{-O}}$  or  $E_{\text{Co/P/WSe}_2\text{-O}}$ .

## Supplementary Figures and Tables

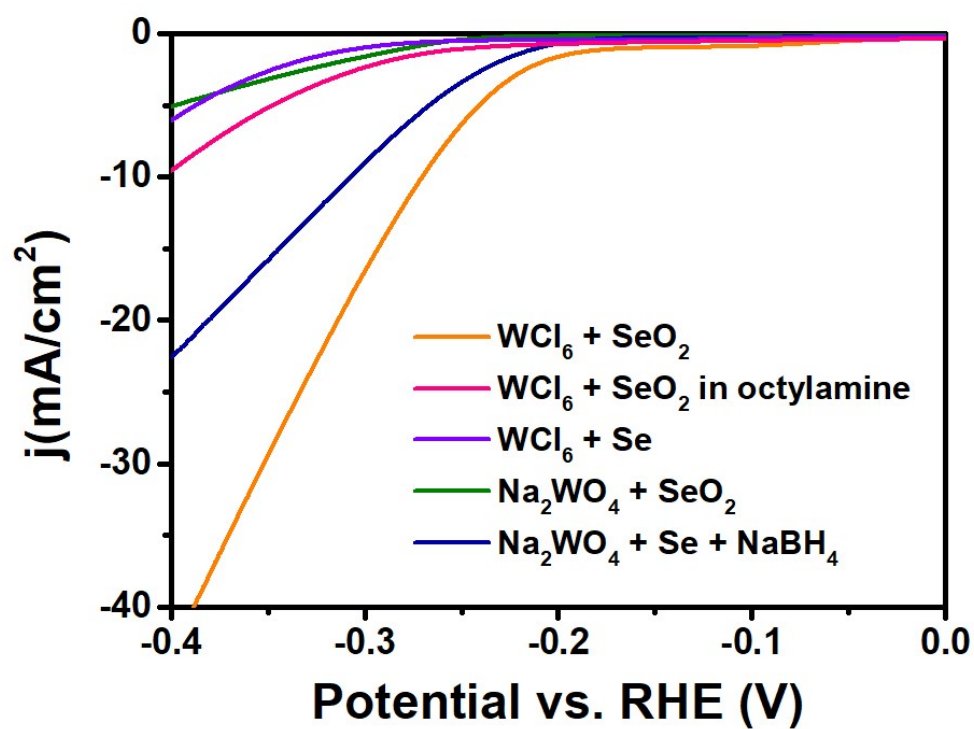

Fig. S1 Polarization curves of WSe<sub>2</sub> synthesized by various precursors.

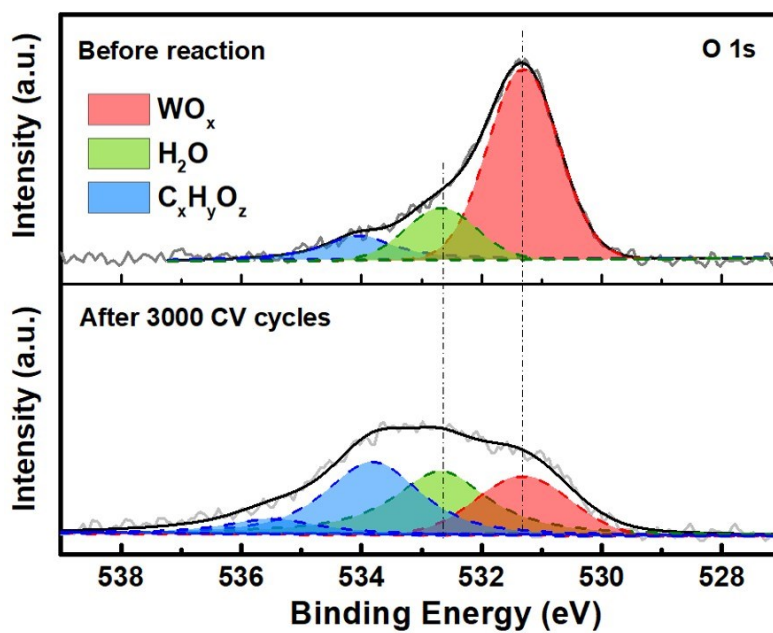

**Fig. S2** O 1s XPS spectra of hp-WSe<sub>2</sub> before and after 3000 CV cycles.

The ratio of O attributed to WO<sub>x</sub> reduced from 68% to 26% after 3000 CV cycles. Considering the overall O amount in the surface of hp-WSe<sub>2</sub> detected by XPS before and after HER cycles (39.7% and 50.6% respectively), the amount of O belong to WO<sub>x</sub> decreased to half of its original value (from 27% to 13%).

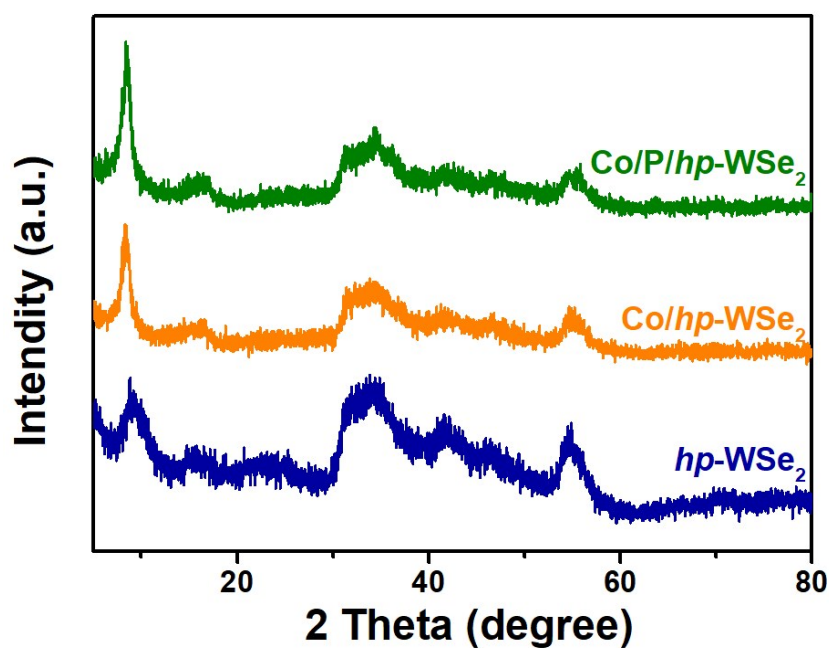

Fig. S3 XRD patterns of  $hp\text{-WSe}_2$ ,  $\text{Co}/hp\text{-WSe}_2$  and  $\text{Co}/\text{P}/hp\text{-WSe}_2$ .

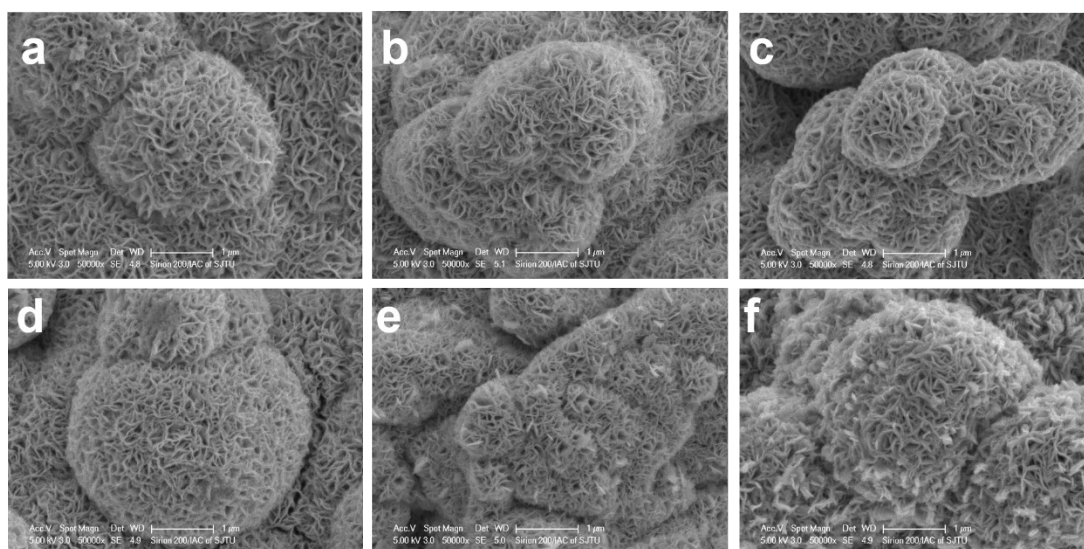

Fig. S4 Typical SEM images of (a)  $hp\text{-WSe}_2$ , (b)  $\text{Co}/hp\text{-WSe}_2$  and (c)  $\text{Co}/\text{P}/hp\text{-WSe}_2$  and (d)  $hp\text{-WSe}_2$ , (e)  $\text{Co}/hp\text{-WSe}_2$  and (f)  $\text{Co}/\text{P}/hp\text{-WSe}_2$  after 3000 CV cycles at -0.3 to 0 V vs. RHE.



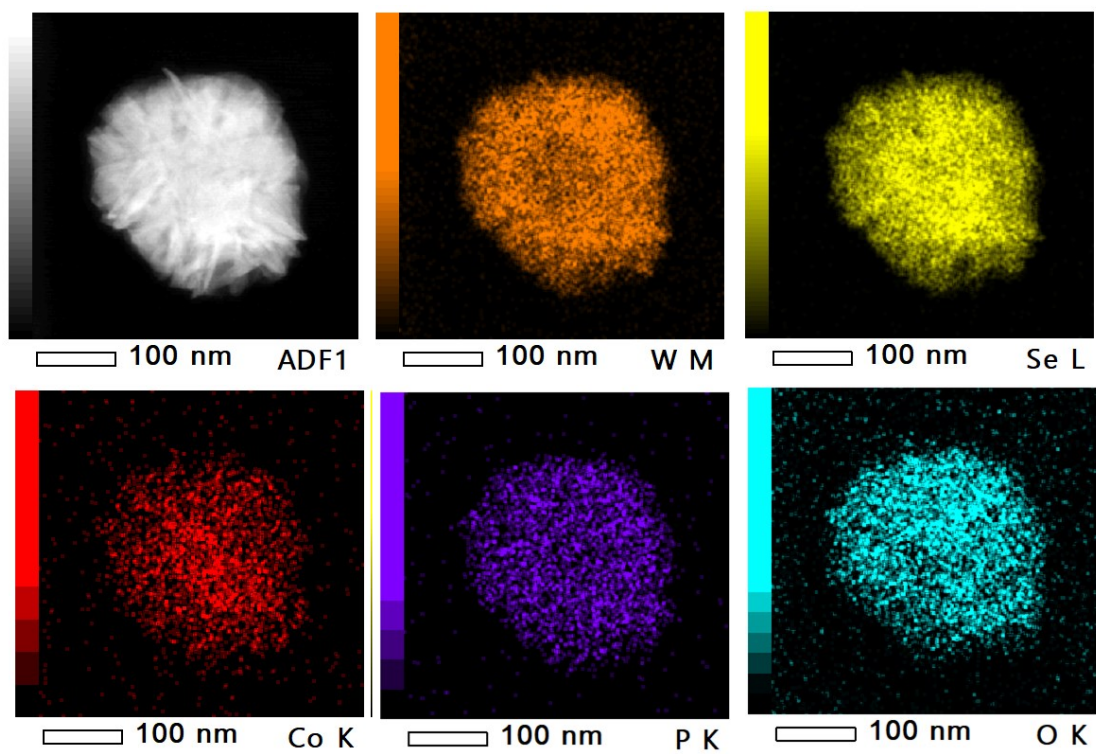

Fig. S5 Elemental mapping results of Co/P/hp-WSe<sub>2</sub>.

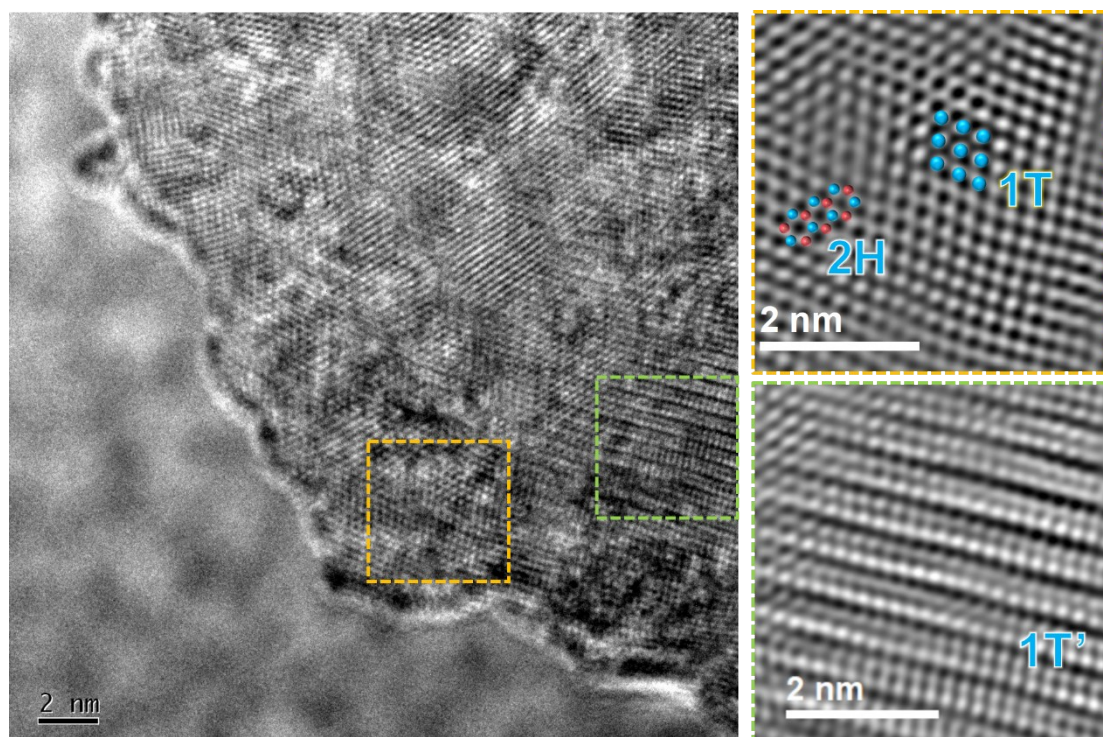

Fig. S6 HRTEM images of Co/P/hp-WSe<sub>2</sub>

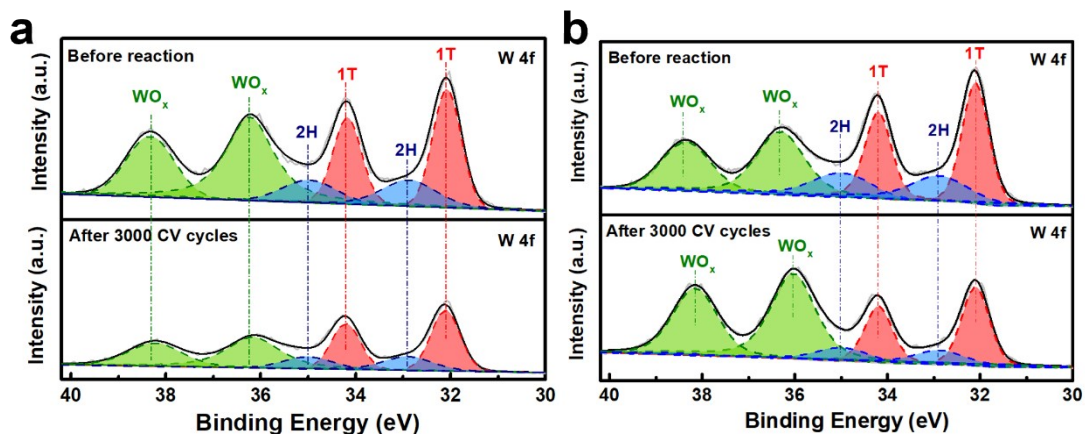

Fig. S7 W 4f XPS spectra of (a) Co/hp-WSe<sub>2</sub> and (b) Co/P/hp-WSe<sub>2</sub> before and after 3000 CV cycles.

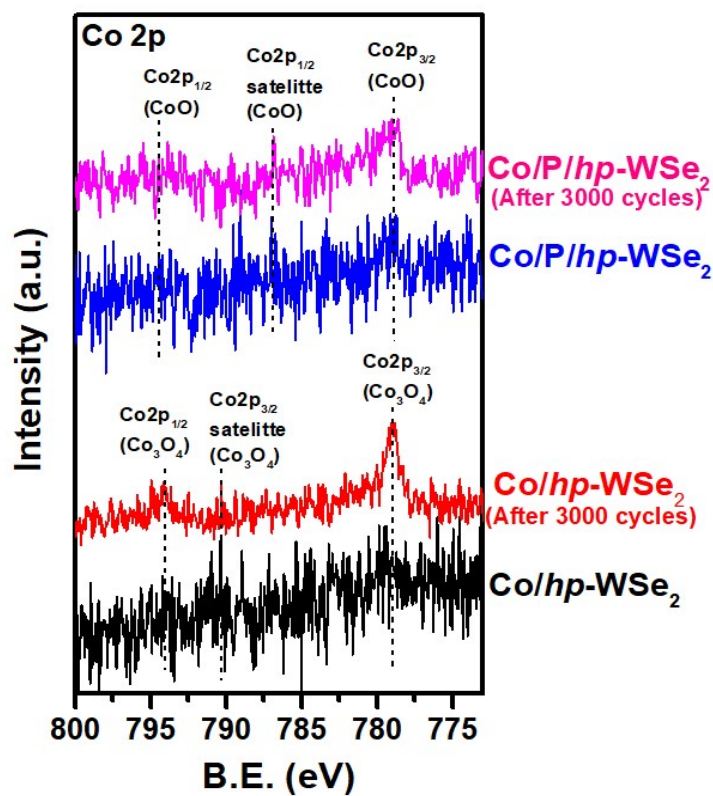

Fig. S8 Co 2p XPS spectra of Co/hp-WSe<sub>2</sub> and Co/P/hp-WSe<sub>2</sub> before and after 3000 CV cycles

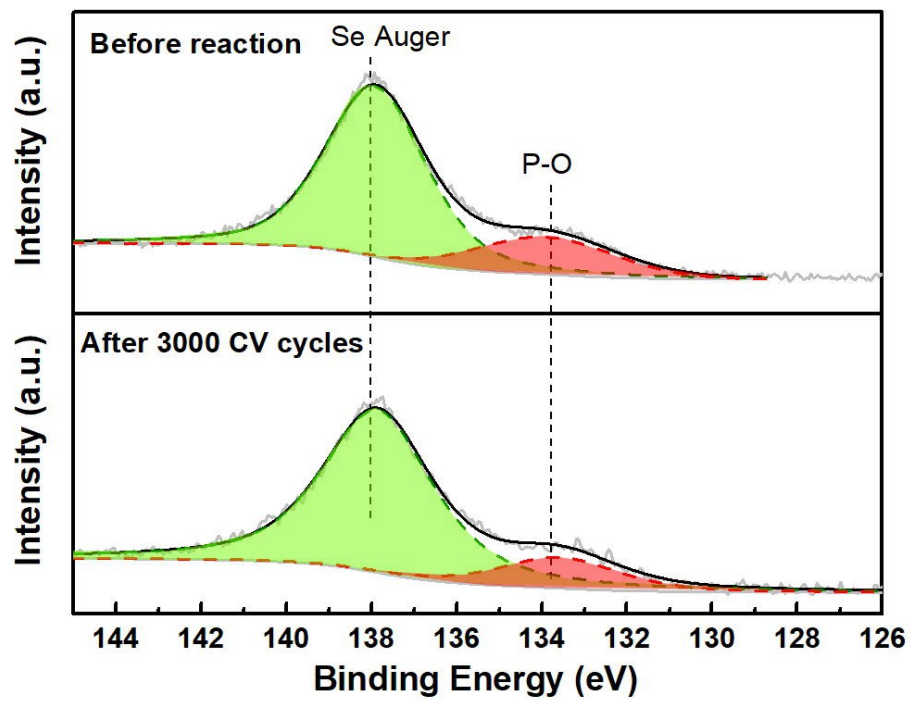

**Fig. S9** XPS spectra in P 2p region of Co/P/hp-WSe<sub>2</sub> before and after 3000 CV cycles.

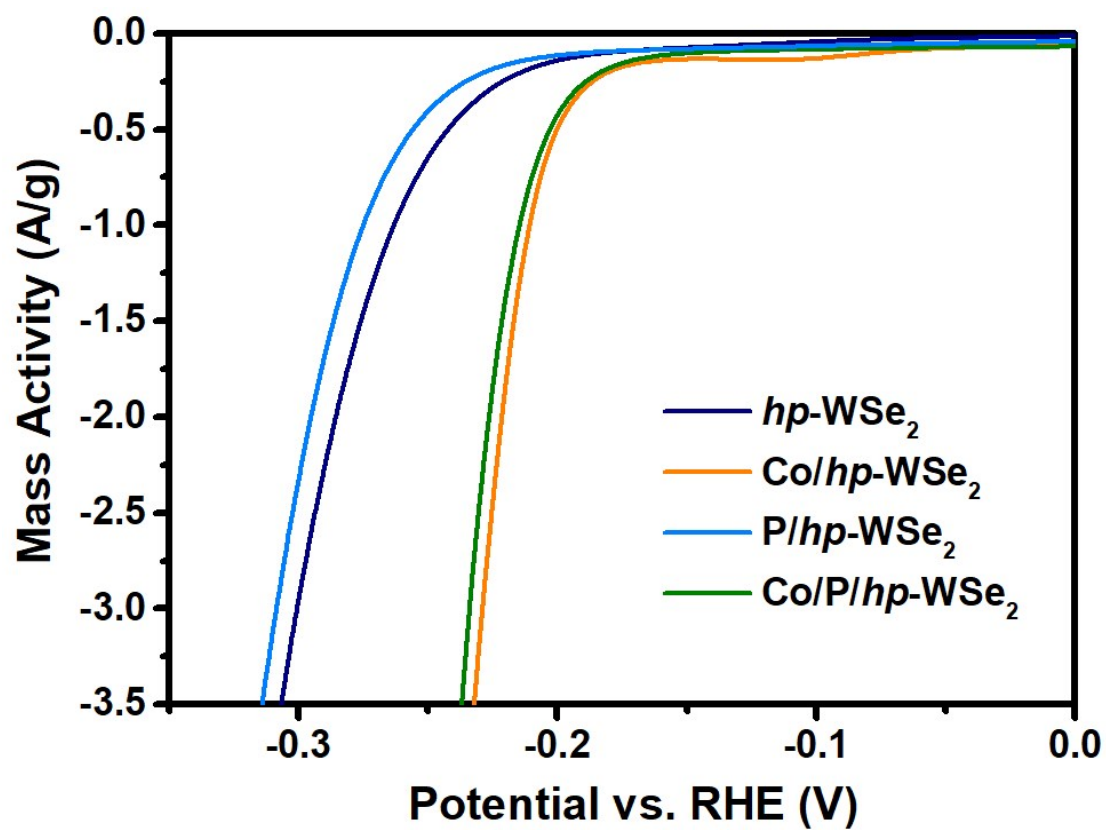

Fig. S10 Mass activities of  $hp\text{-WSe}_2$ ,  $\text{Co}/hp\text{-WSe}_2$ ,  $\text{P}/hp\text{-WSe}_2$  and  $\text{Co}/\text{P}/hp\text{-WSe}_2$ .

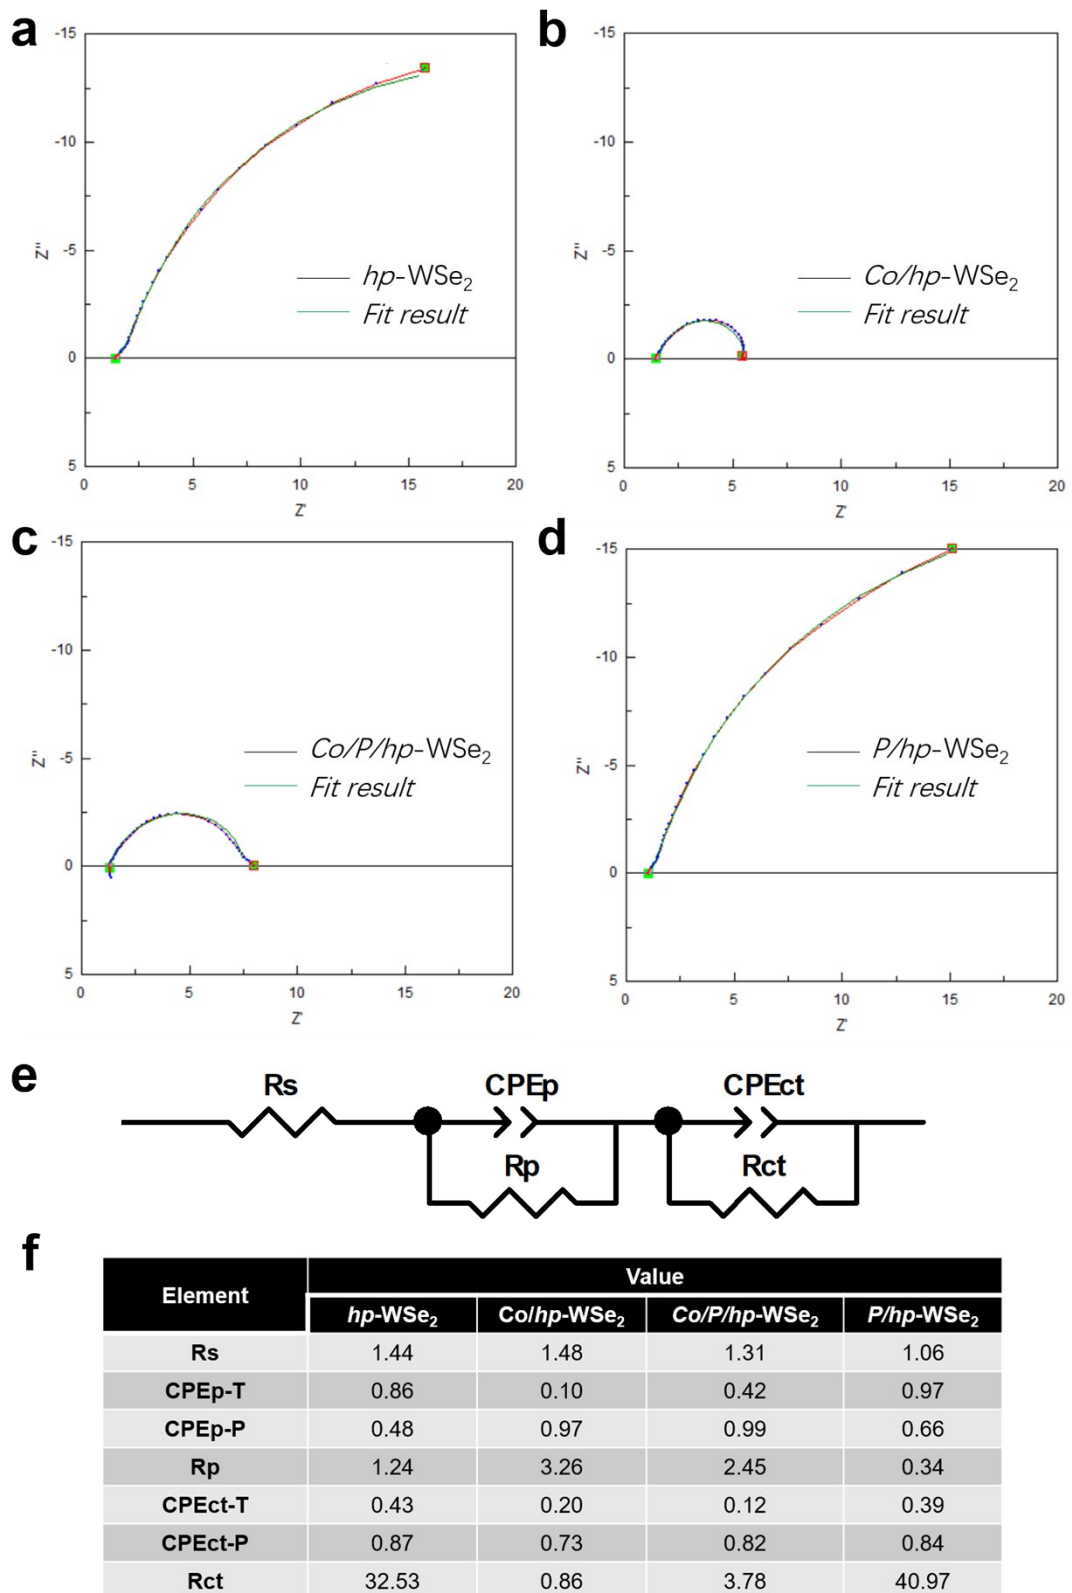

**Fig. S11** The electrochemical impedance spectra and fitting results of (a)  $hp-WSe_2$ , (b)  $Co/hp-WSe_2$ , (c)  $P/hp-WSe_2$  and (d)  $Co/P/hp-WSe_2$ ; (e) The fitted equivalent circuits and (f) the corresponding data for each sample.

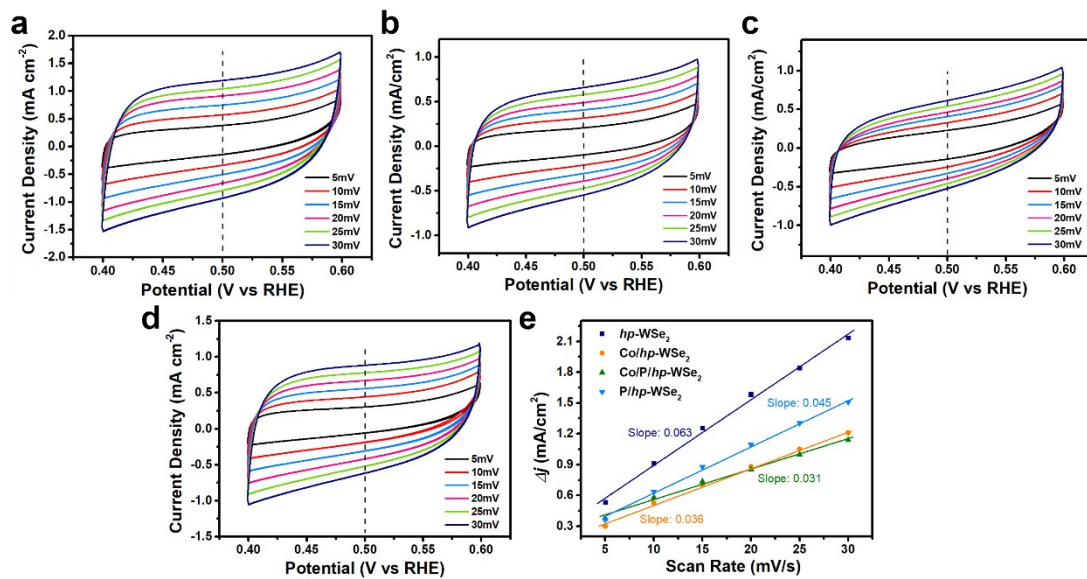

**Fig. S12** Cyclic voltammograms in a non-Faradaic region (0.4~0.6 V vs RHE) at scan rates of 5-30 mV/s for (a)  $hp\text{-WSe}_2$ , (b)  $\text{Co}/hp\text{-WSe}_2$ , (c)  $\text{Co}/\text{P}/hp\text{-WSe}_2$  and (d)  $\text{P}/hp\text{-WSe}_2$ ; (e) Capacitive  $\Delta j = j_a - j_c$  as a function of the scan rate for the samples.

**Table S1** HER performance of reported WSe<sub>2</sub> catalysts in 0.5 M H<sub>2</sub>SO<sub>4</sub>

| Sample Name                                                                              | 1T/1T' ratio | $\eta_{10}$ (mV) | Tafel Slope (mV/dec) | Ref.                                  |
|------------------------------------------------------------------------------------------|--------------|------------------|----------------------|---------------------------------------|
| WSe <sub>2</sub> nanofilms on carbon fiber paper                                         | N/A          | 300              | 77.4                 | Wang et al., 2013 <sup>5</sup>        |
| Bulk or MeLi/BuLi exfoliated WSe <sub>2</sub>                                            | 2.6~66%      | 800~700          | 100~120              | Eng et al., 2014 <sup>6</sup>         |
| WSe <sub>2</sub> Nanotubes                                                               | N/A          | ~350             | 99                   | Xu et al., 2014 <sup>7</sup>          |
| WS <sub>0.48</sub> Se <sub>0.52</sub> Nanotubes                                          | N/A          | ~270             | 105                  |                                       |
| BuLi exfoliated WSe <sub>2</sub>                                                         | <5%          | 750~800          | >240                 | Ambrosi et al., 2015 <sup>8</sup>     |
| WSe <sub>2</sub> on carbon nanofiber                                                     | N/A          | 158-214          | 98-117               | Zou et al., 2015 <sup>9</sup>         |
| W(Se <sub>0.4</sub> S <sub>0.6</sub> ) <sub>2</sub> nanoflakes grown on carbon nanofiber | N/A          | 174              | 108                  | Zou et al., 2015 <sup>9</sup>         |
| 3D dendritic WSe <sub>2</sub> on carbon nanofiber mats                                   | N/A          | 228              | 80                   | Zou et al., 2015 <sup>10</sup>        |
| Co-WSe <sub>2</sub> /rGO                                                                 | N/A          | 217              | 64                   | Huang et al., 2016 <sup>11</sup>      |
| WSe <sub>2</sub> layers on graphene sheets                                               | N/A          | 180              | 64                   | Liu et al., 2016 <sup>12</sup>        |
| WSe <sub>2</sub> with Se vacancies                                                       | N/A          | 245              | 76                   | Sun et al., 2016 <sup>3</sup>         |
| Mo <sub>0.57</sub> We <sub>0.43</sub> Se <sub>2</sub>                                    | N/A          | 209              | 76                   | Meiron et al., 2017 <sup>13</sup>     |
| V/Nb/Ta doped WSe <sub>2</sub>                                                           | ~60%         | ~750             | 110~130              | Chia et al., 2018 <sup>14</sup>       |
| Li <sup>+</sup> activated WSe <sub>2</sub> on carbon fiber electrode                     | N/A          | 243              | 116                  | Henckel et al., 2018 <sup>15</sup>    |
| WSe <sub>2</sub> /rGO hybrid structure                                                   | N/A          | 450              | 85                   | Li et al., 2018 <sup>16</sup>         |
| Strained Co-doped WSe <sub>2</sub> /MWNT                                                 | 72.1%        | 174              | 37                   | Zhang et al., 2018 <sup>17</sup>      |
| 1T' WSe <sub>2</sub>                                                                     | 100%         | 510              | 150                  | Sokolikova et al., 2019 <sup>18</sup> |
| 2H WSe <sub>2</sub> (by annealing 1T' WSe <sub>2</sub> at 500 °C)                        | 0%           | 640              | 232                  |                                       |
| 10% Ni-WSe <sub>2</sub>                                                                  | N/A          | 259              | 86                   | Kadam et al., 2020 <sup>4</sup>       |
| Co/P/hp-WSe <sub>2</sub>                                                                 | 64%          | 225              | 39                   | Present Work                          |

## Reference

1. G. Kresse and D. Joubert, *Phys. Rev. B*, 1999, **59**, 1758-1775.
2. H. Li, C. Tsai, A. L. Koh, L. Cai, A. W. Contryman, A. H. Fragapane, J. Zhao, H. S. Han, H. C. Manoharan and F. Abild-Pedersen, *Nat. Mater.*, 2016, **15**, 48-53.
3. Y. Sun, X. Zhang, B. Mao and M. Cao, *Chem. Commun.*, 2016, **52**, 14266-14269.
4. S. R. Kadam, A. N. Enyashin, L. Houben, R. Bar-Ziv and M. Bar-Sadan, *J. Mater. Chem. A*, 2020, **8**, 1403-1416.
5. H. Wang, D. Kong, P. Johannes, J. J. Cha, G. Zheng, K. Yan, N. Liu and Y. Cui, *Nano Lett.*, 2013, **13**, 3426-3433.
6. A. Y. Eng, A. Ambrosi, Z. Sofer, P. Simek and M. Pumera, *ACS Nano*, 2014, **8**, 12185-12198.
7. K. Xu, F. Wang, Z. Wang, X. Zhan, Q. Wang, Z. Cheng, M. Safdar and J. He, *ACS Nano*, 2014, **8**, 8468-8476.
8. A. Ambrosi, Z. Sofer and M. Pumera, *Chem. Commun.*, 2015, **51**, 8450-8453.
9. M. Zou, J. Chen, L. Xiao, H. Zhu, T. Yang, M. Zhang and M. Du, *J. Mater. Chem. A*, 2015, **3**, 18090-18097.
10. M. Zou, J. Zhang, H. Zhu, M. Du, Q. Wang, M. Zhang and X. Zhang, *J. Mater. Chem. A*, 2015, **3**, 12149-12153.
11. Y. Huang, Z. Ma, Y. Hu, D. Chai, Y. Qiu, G. Gao and P. Hu, *RSC Adv.*, 2016, **6**, 51725-51731.
12. Z. Liu, H. Zhao, N. Li, Y. Zhang, X. Zhang and Y. Du, *Inorg. Chem. Front.*, 2016, **3**, 313-319.
13. O. E. Meiron, V. Kuraganti, I. Hod, R. Bar-Ziv and M. Bar-Sadan, *Nanoscale*, 2017, **9**, 13998-14005.
14. X. S. Chia, N. A. A.; Sofer, Z.; Luxa, J.; Pumera, M., *Chem. Eur. J.*, 2018, **24**, 3199–3208.
15. D. A. Henckel, O. M. Lenz, K. M. Krishnan and B. M. Cossairt, *Nano Lett.*, 2018, **18**, 2329-2335.
16. J. Li, P. Liu, Y. Qu, T. Liao and B. Xiang, *International Journal of Hydrogen Energy*, 2018, **43**, 2601-2609.
17. G. Zhang, X. Zheng, Q. Xu, J. Zhang, W. Liu and J. Chen, *J. Mater. Chem. A*, 2018, **6**, 4793-4800.
18. M. S. Sokolikova, P. C. Sherrell, P. Palczynski, V. L. Bemmer and C. Mattevi, *Nat. Comm.*, 2019, **10**, 712.
